# Supplementary material for: Immobilization of horseradish peroxidase on UiO-66-NH2 for colorimetric and fluorometric sensing of nitrite
Source: Royal Society of Chemistry journal article supplement (doi:10.1039/d4nr05024j), 2025-01-01
Supplement: d4nr05024j1.pdf [file d4nr05024j1.pdf]

Supplementary Material

# **Immobilization of Horseradish Peroxidase on UIO-66-NH<sub>2</sub> for Colorimetric and Fluorometric Sensing of Nitrite**

Zuyao Fu <sup>a</sup>, Lingfeng Yang <sup>a</sup>, Zhaoyang Ding <sup>a,b,c \*</sup>, Jing Xie <sup>a,b \*</sup>

*a College of Food Science and Technology, Shanghai Ocean University, Shanghai 201306, China*

*b Shanghai Engineering Research Center of Aquatic-Product Processing & Preservation, Shanghai 201306, China*

*c Marine Biomedical Science and Technology Innovation Platform of Lin-gang Special Area, Shanghai 201306, China*

\* Corresponding authors. E-mail addresses: zyding@shou.edu.cn (Z. Ding); jxie@shou.edu.cn (J. Xie).

## **Characterizations**

The morphology of the materials was observed using a Talos F200X transmission electron microscope (TEM) and an SU5000 scanning electron microscope (SEM). X-ray diffraction (XRD) measurements were obtained using an Ultima IV diffractometer. Fourier transform infrared spectroscopy spectra (FTIR) were recorded with a Nicolet iS5 spectrometer. Particle size and zeta potential were measured using a Zetasizer Pro Nanoparticle Size and Zeta Potential Analyzer. X-ray photoelectron spectroscopy (XPS) analysis was performed with an EscaLab 250Xi spectrometer. CLSM images were taken on Leica SP5. Ultraviolet-visible absorption spectra were acquired using a U-3900 spectrophotometer. Fluorescence signals were recorded using an F-7000 spectrophotometer.

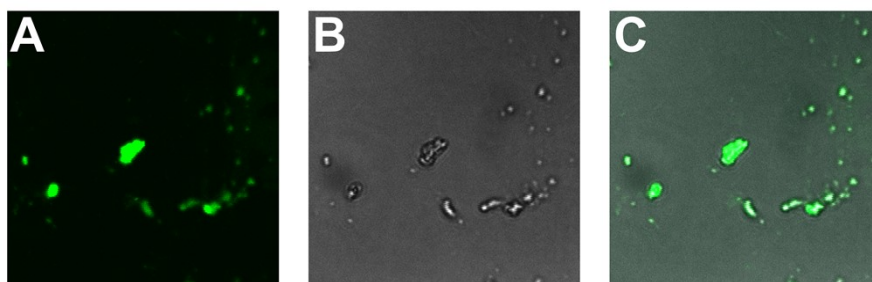

**Figure S1.** CLSM images of (A) fluorescent, (B) optical, and (C) overlap of optical and fluorescent images of HRP@UiO-66-NH<sub>2</sub>.

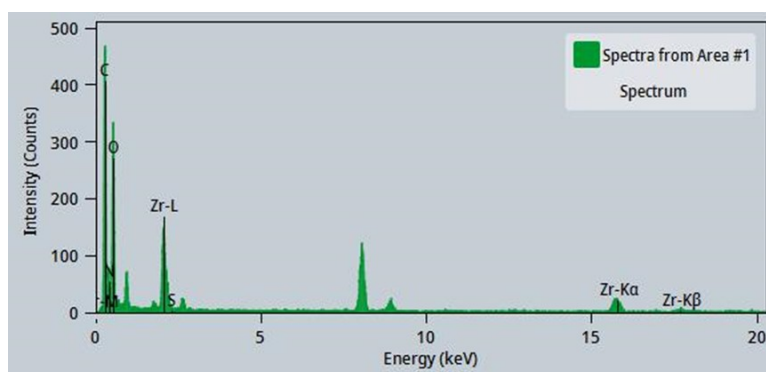

**Figure S2.** EDS pattern of UiO-66-NH<sub>2</sub>.

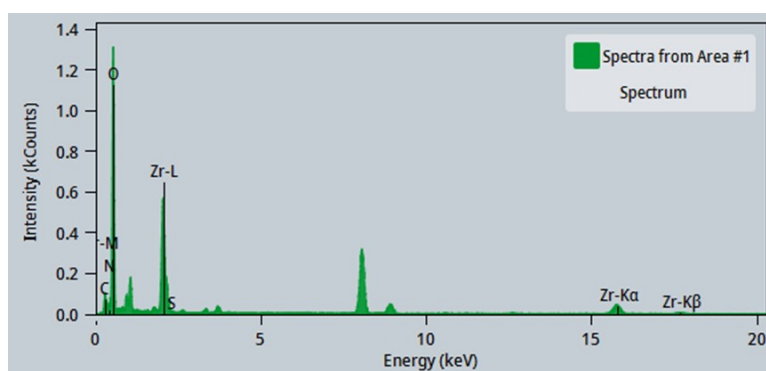

**Figure S3.** EDS pattern of HRP@UiO-66-NH<sub>2</sub>

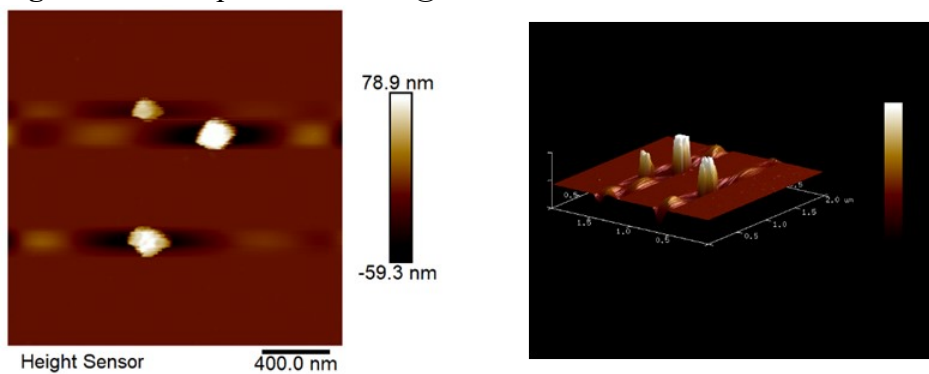

**Figure S4.** AFM pattern of UiO-66-NH<sub>2</sub>.

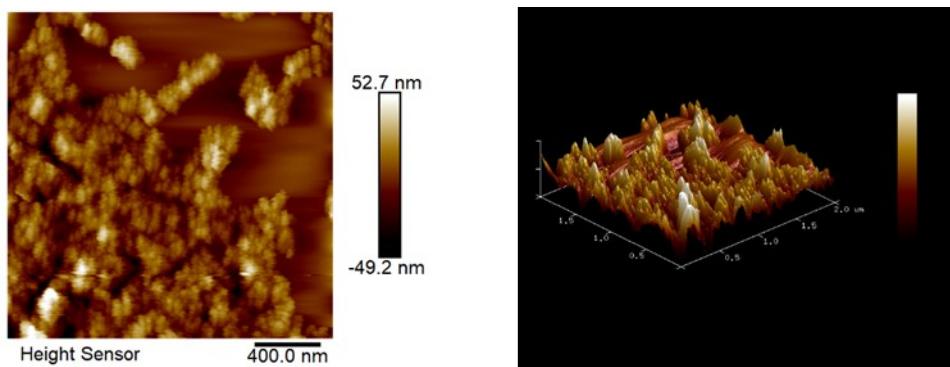

**Figure S5.** AFM pattern of UiO-66-NH<sub>2</sub>.

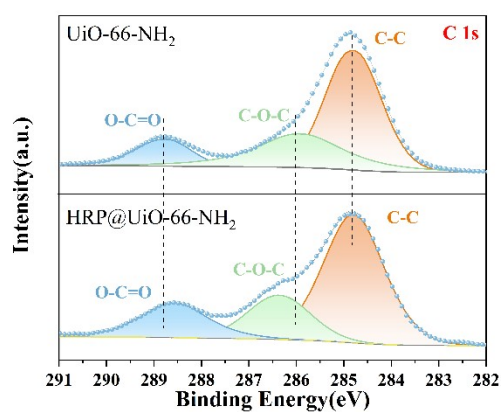

**Figure S6.** C 1s high resolution XPS spectra of UiO-66-NH<sub>2</sub> (top) and HRP@UiO-66-NH<sub>2</sub> (below).

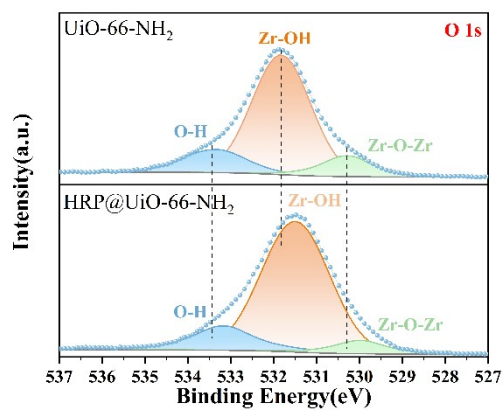

**Figure S7.** O 1s high resolution XPS spectra of UiO-66-NH<sub>2</sub> (top) and HRP@UiO-66-NH<sub>2</sub> (below).

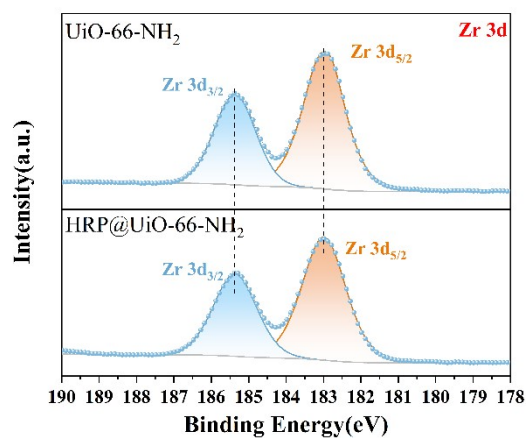

**Figure S8.** Zr 3d high resolution XPS spectra of UiO-66-NH<sub>2</sub> (top) and HRP@UiO-66-NH<sub>2</sub> (below).

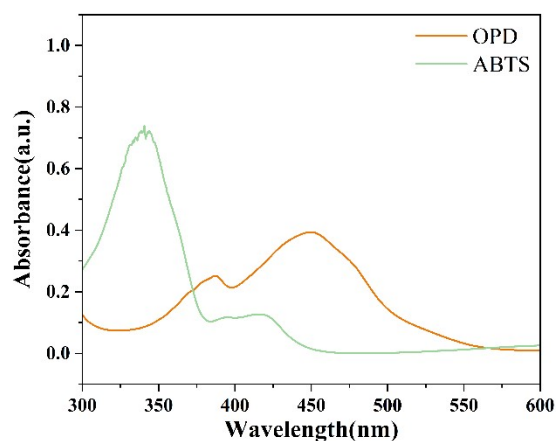

**Figure S9.** UV-vis absorption patterns of HRP@UiO-66-NH<sub>2</sub> + OPD + H<sub>2</sub>O<sub>2</sub> and HRP@UiO-66-NH<sub>2</sub> + ABTS + H<sub>2</sub>O<sub>2</sub>.

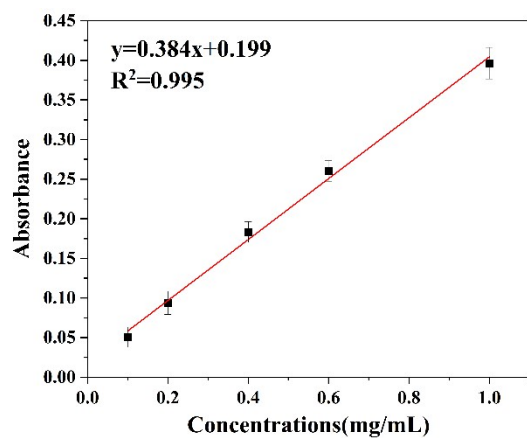

**Figure S10.** The standard curve of absorbance and BSA concentration.

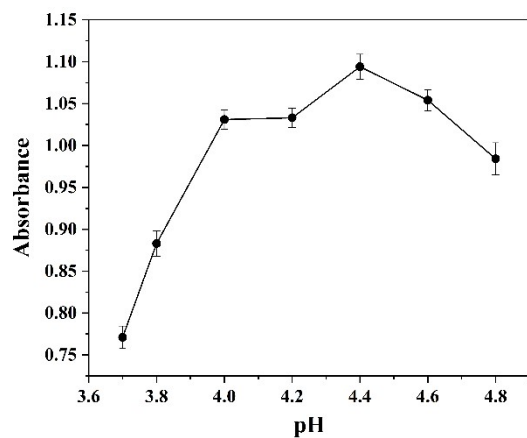

**Figure S11.** Effect of buffer pH on the absorbance of HRP@UiO-66-NH<sub>2</sub> + TMB + H<sub>2</sub>O<sub>2</sub>.

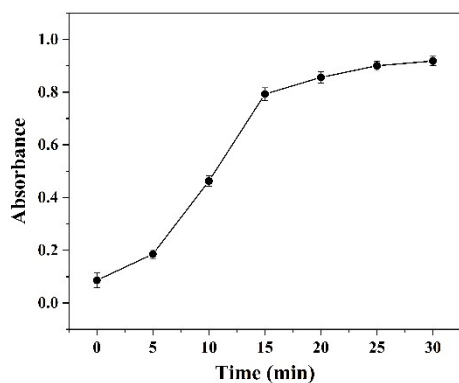

**Figure S12.** The absorbance of HRP@UiO-66-NH<sub>2</sub> + TMB + H<sub>2</sub>O<sub>2</sub> at different time.

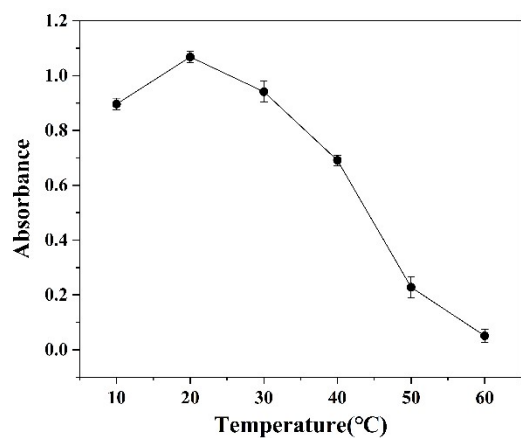

**Figure S13.** Effect of temperature on the absorbance of HRP@UiO-66-NH<sub>2</sub> + TMB + H<sub>2</sub>O<sub>2</sub>.

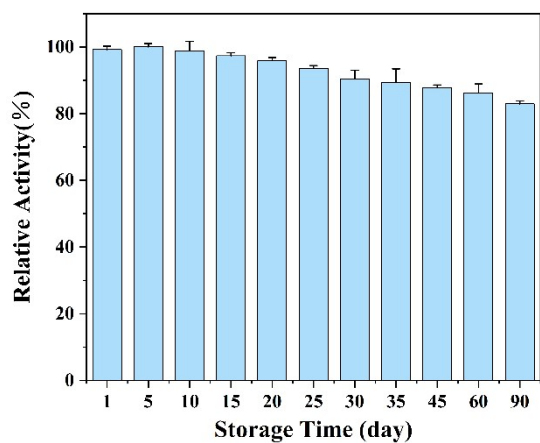

**Figure S14.** Oxidase-mimetic activity stability of HRP@UiO-66-NH<sub>2</sub> during storage

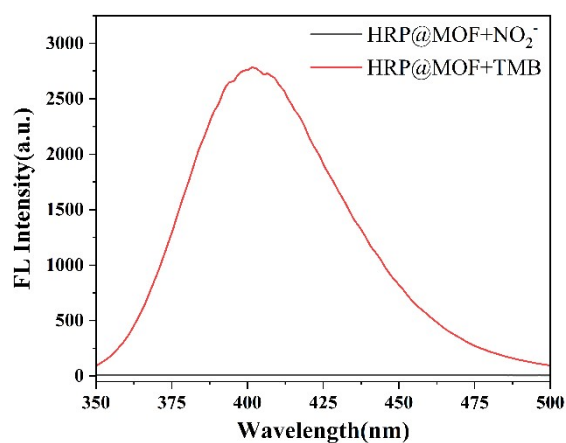

**Figure S15.** Fluorescence spectra of HRP@UiO-66-NH<sub>2</sub> in the presence and absence of NO<sub>2</sub><sup>-</sup>.

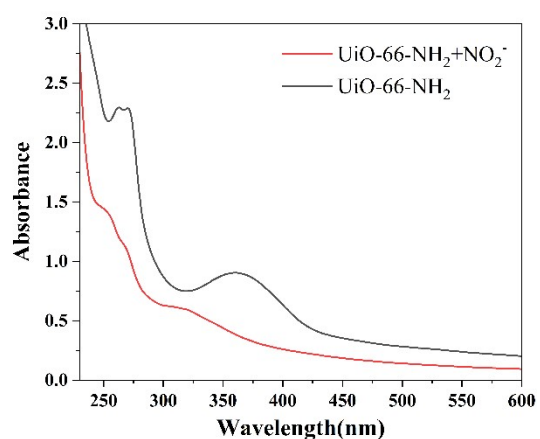

**Figure S16.** UV-vis absorption spectra of HRP@UiO-66-NH<sub>2</sub> in the presence and absence of NO<sub>2</sub><sup>-</sup>.

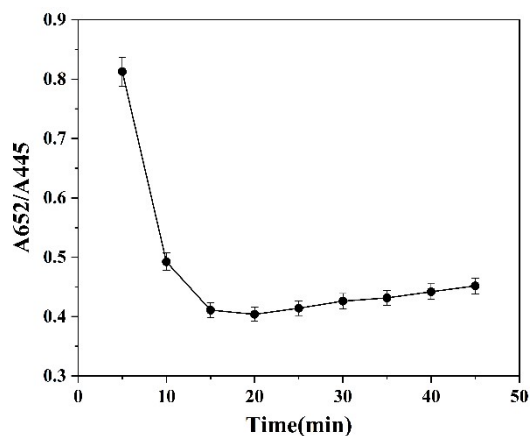

**Figure S17.** Effect of time on the colorimetric signal A652/A445 along with the diazotization time of TMB<sup>+</sup> and NO<sub>2</sub><sup>-</sup>.

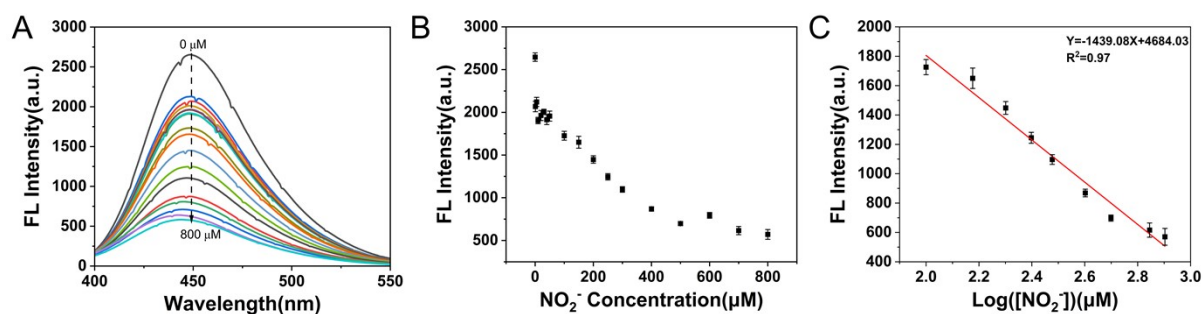

**Figure S18.** The response of UiO-66-NH<sub>2</sub> towards nitrite.

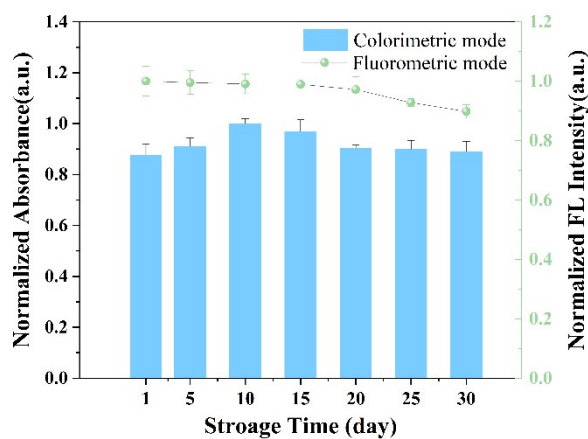

**Figure S19.** The stability of colorimetric/fluorometric dual-mode sensors.



Table S1 The calculated catalytic kinetic parameters for free enzymes and HRP@UiO-66-NH<sub>2</sub>

| substrate                     | enzyme probe               | K <sub>m</sub> (mM) | V <sub>max</sub> (M s <sup>-1</sup> ) | K <sub>cat</sub> (s <sup>-1</sup> ) |
|-------------------------------|----------------------------|---------------------|---------------------------------------|-------------------------------------|
| TMB                           | HRP@UiO-66-NH <sub>2</sub> | 0.23                | 15.36 × 10 <sup>-8</sup>              | 6.14 × 10 <sup>3</sup>              |
|                               | Free HRP                   | 0.434               | 10.00 × 10 <sup>-8</sup>              | 4.00 × 10 <sup>3</sup>              |
| H <sub>2</sub> O <sub>2</sub> | HRP@UiO-66-NH <sub>2</sub> | 1.00                | 2.36 × 10 <sup>-8</sup>               | 0.94 × 10 <sup>3</sup>              |
|                               | Free HRP                   | 3.70                | 8.71 × 10 <sup>-8</sup>               | 3.48 × 10 <sup>3</sup>              |

Table S2 Comparison of the reusability presented in this work with that reported previously.

| Enzyme@(material)                                             | Reusability | Residual activity | Ref       |
|---------------------------------------------------------------|-------------|-------------------|-----------|
| HRP@UiO-66-NH <sub>2</sub>                                    | 10          | 75.76%            | This work |
| HRP@(amidoximated acrylic polymer)                            | 10          | 45.0%             | 1         |
| HRP@(functionalized reduced graphene oxide)                   | 10          | 70%               | 2         |
| HRP@(electrospun magnetic nanofibers)                         | 5           | 52%               | 3         |
| HRP@(functionalized reduced graphene oxide-SiO <sub>2</sub> ) | 10          | 70%               | 4         |
| HRP@(cationic microporous starch)                             | 10          | 66%               | 5         |
| HRP@CN/Cu <sub>3</sub> (PO <sub>4</sub> ) <sub>2</sub>        | 5           | 83.6%             | 6         |
| HRP@(PDA/expanded polystyrene foam)                           | 15          | 60%               | 7         |

Table S3 Performance comparison of our colorimetric/fluorometric method with previously reported approaches for nitrite detection

| Sensor Material                              | Year | Detection mode | Detecting range | Detection limit | Ref. |
|----------------------------------------------|------|----------------|-----------------|-----------------|------|
| UiO-66-NH <sub>2</sub>                       | 2020 | Fluorometric   | 0–10 mM         | 77 μM           | 8    |
| UiO-66-NH <sub>2</sub> -Cit                  | 2020 | Fluorometric   | 0–800 μM        | –               | 9    |
| Tb-MOF                                       | 2021 | Fluorometric   | 4–200 μM        | 1.25 μM         | 10   |
| Eu <sup>3+</sup> @UiO-66-(COOH) <sub>2</sub> | 2021 | Fluorometric   | 0–60 μM         | 0.69 μM         | 11   |
| MnFeO                                        | 2021 | Colorimetric   | 3.3~133.3 μM    | 0.2 μM          | 12   |
| MnCDs                                        | 2022 | Colorimetric   | 2–150 μM,       | 0.16 μM         | 13   |

|  |                             |      |                 |                           |                    |    |
|--|-----------------------------|------|-----------------|---------------------------|--------------------|----|
|  |                             |      | Fluorometric    | 2 to 150 $\mu\text{M}$    | 1.07 $\mu\text{M}$ |    |
|  | CeO <sub>2</sub>            | 2023 | Colorimetric    | 2–100 $\mu\text{M}$       | 0.29 $\mu\text{M}$ | 14 |
|  | Ru@UiO-66-NH <sub>2</sub>   | 2024 | Fluorometric    | 10.0 - 15.0 $\mu\text{M}$ | 0.3 $\mu\text{M}$  | 15 |
|  | P–N–C nonmetal<br>nanozymes | 2024 | Electrochemical | 1–800 $\mu\text{M}$       | 0.21 $\mu\text{M}$ | 16 |
|  |                             |      | Colorimetric    | 1 to 700 $\mu\text{M}$    | 0.24 $\mu\text{M}$ |    |

Table S4 Detection results by our colorimetric/ fluorometric sensing platform of nitrite in real samples.

| Detection mode | Sample       | Spiked ( $\mu\text{M}$ ) | Detected ( $\mu\text{M}$ ) | RSD (% , n=3) | Recovery (%) |
|----------------|--------------|--------------------------|----------------------------|---------------|--------------|
| colorimetric   | lake water   | 0                        | 0.20                       | 0.13          | NA           |
|                |              | 50                       | 50.68                      | 1.86          | 101.96       |
|                |              | 100                      | 89.31                      | 0.92          | 89.11        |
|                | sausages     | 0                        | 8.32                       | 2.36          | NA           |
|                |              | 50                       | 58.61                      | 1.83          | 100.58       |
|                |              | 100                      | 107.93                     | 4.61          | 99.61        |
|                | pickled fish | 0                        | 10.36                      | 0.82          | NA           |
|                |              | 50                       | 55.60                      | 0.37          | 90.48        |
|                |              | 100                      | 105.75                     | 1.64          | 95.39        |
|                | pickle brine | 0                        | 1.92                       | 0.38          | NA           |
|                |              | 50                       | 52.37                      | 4.93          | 100.9        |
|                |              | 100                      | 101.49                     | 1.73          | 99.57        |
| Fluorometric   | lake water   | 0                        | 0.22                       | 2.37          | NA           |
|                |              | 50                       | 51.36                      | 2.66          | 102.28       |
|                |              | 100                      | 103.84                     | 1.87          | 103.62       |
|                | sausages     | 0                        | 8.57                       | 2.47          | NA           |
|                |              | 50                       | 53.28                      | 0.63          | 89.24        |
|                |              | 100                      | 109.83                     | 1.79          | 101.26       |
|                | pickled fish | 0                        | 10.52                      | 1.21          | NA           |
|                |              | 50                       | 60.88                      | 3.07          | 100.72       |
|                |              | 100                      | 104.39                     | 0.93          | 93.87        |
|                | pickle brine | 0                        | 2.81                       | 4.71          | NA           |
|                |              | 50                       | 49.29                      | 0.89          | 92.96        |
|                |              | 100                      | 103.82                     | 5.32          | 101.01       |

NA = not applicable

## Reference

- 1 S. A. Mohamed, S. S. Al-Ghamdi and R. M. El-Shishtawy, *Int J Biol Macromol*, 2016, **91**, 663–670.
- 2 M. Besharati Vineh, A. A. Saboury, A. A. Poostchi, A. M. Rashidi and K. Parivar, *Int J Biol Macromol*, 2018, **106**, 1314–1322.
- 3 J. Li, X. Chen, D. Xu and K. Pan, *Ecotoxicol Environ Saf*, 2019, **170**, 716–721.
- 4 M. B. Vineh, A. A. Saboury, A. A. Poostchi and A. Ghasemi, *Int J Biol Macromol*, 2020, **164**, 4403–4414.
- 5 M. E. El-Naggar, A. M. Abdel-Aty, A. R. Wassel, N. M. Elaraby and S. A. Mohamed, *Int J Biol Macromol*, 2021, **181**, 734–742.
- 6 J. Wu, X. Ma, C. Li, X. Zhou, J. Han, L. Wang, H. Dong and Y. Wang, *Chemical Engineering Journal*, 2022, **427**, 131808.
- 7 M. A. Yassin and A. A. M. Gad, *J Environ Chem Eng*, 2020, **8**, 104435.
- 8 X. Hao, Y. Liang, H. Zhen, X. Sun, X. Liu, M. Li, A. Shen and Y. Yang, *J Solid State Chem*, 2020, **287**, 121323.
- 9 S. Zhu, L. Zhao and B. Yan, *Microchemical Journal*, 2020, **155**, 104768.
- 10 X. Yang, M. Zhang, J. Xu, S. Wen, Y. Zhang and J. Zhang, *Spectrochim Acta A Mol Biomol Spectrosc*, DOI:10.1016/j.saa.2021.119553.
- 11 Y. Li, Y. Zhao, W. Zhang, K. Shao and H. Zhou, *Z Anorg Allg Chem*, 2021, **647**, 1091–1095.
- 12 M. Wang, P. Liu, H. Zhu, B. Liu and X. Niu, *Biosensors (Basel)*, DOI:10.3390/bios11080280.
- 13 M. Wang, H. Zhu, B. Liu, P. Hu, J. Pan and X. Niu, *ACS Appl Mater Interfaces*, 2022, **14**, 44762–44771.
- 14 S. Wei, Y. Yang, J. Li, J. Wang, J. Tang, N. Wang and Z. Li, *Chinese Chemical Letters*, 2023, 109114.
- 15 M. Liang, Y. Gao, X. Sun, R.-M. Kong, L. Xia and F. Qu, *J Hazard Mater*, 2024, **469**, 134021.
- 16 Y. Li, Y. Zhang, R. Javed, R. Li, H. Zhao, X. Liu, C. Zhang, H. Cao and D. Ye, *Food Chem*, 2024, **441**, 138315.
